# Supplementary material for: Early and extraordinary peaks in physical performance come with a longevity cost
Source: PubMed Central journal article supplement (PMC5032698; doi:10.18632/aging.101023), 2016-08-19
Supplement: aging-08-1822-s001.pdf [file aging-08-1822-s001.pdf]

## SUPPLEMENTARY DATA

**Table S1.** Characteristics of included athletes

|                                              |                  |
|----------------------------------------------|------------------|
| Athletes (n)                                 | 1055             |
| Male (n)                                     | 958              |
| Female (n)                                   | 97               |
| Year of birth (median, range)                | 1897 (1864-1913) |
| Year of death (median, range)                | 1969 (1901-2010) |
| Age at death (mean, SD)                      | 72.1 (16.9)      |
| Personal records (n)                         | 2320             |
| Personal records per athlete (median, range) | 2 (1-10)         |
| Age at personal record (mean, SD)            | 24.9 (3.8)       |
| Disciplines (n)                              | 58               |
| Nationalities (n)                            | 41               |
| SD=Standard deviation                        |                  |
